# Supplementary material for: Vapor pressure deficit plays a pivotal role in the carbon dioxide sink of the Jingxin Wetland
Source: Copernicus journal article supplement (doi:10.5194/egusphere-2024-2787), 2024-10-07
Supplement: Supplementary file 1 [file egusphere-2024-2787-supplement.zip]

## Supplementary materials

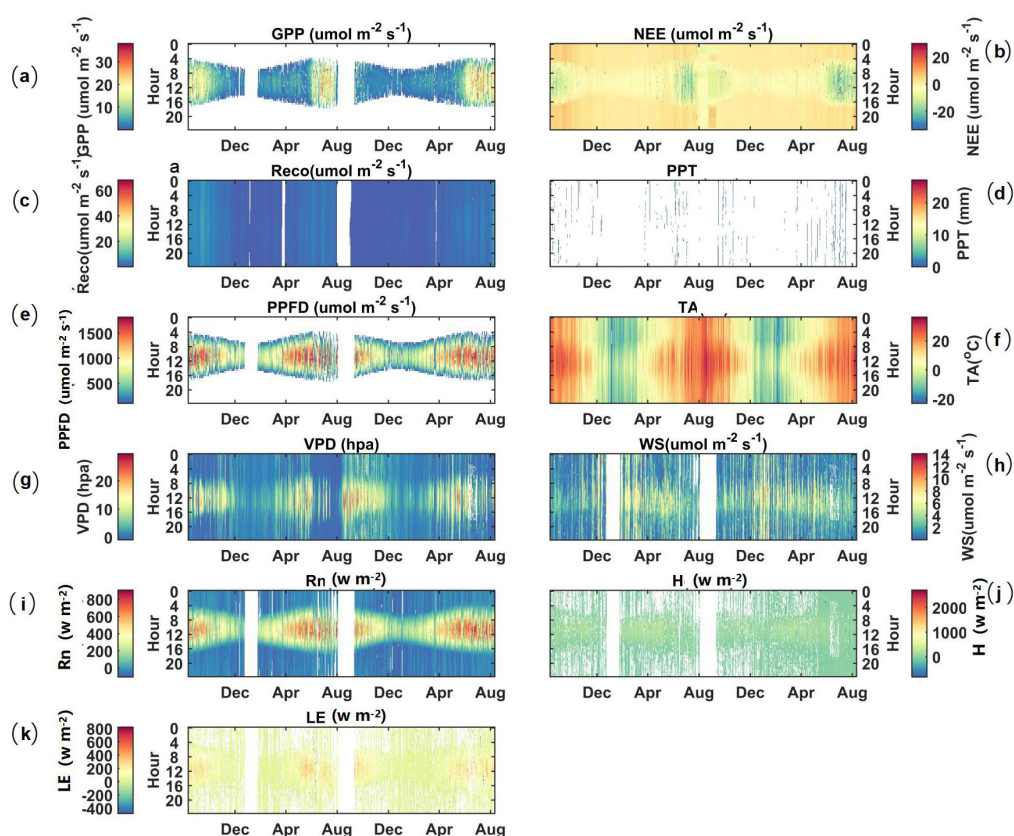

Figure S1. Diurnal variability of gap-filled NEE and partitioned Re and GPP in August 2021 - July (a). Half-hourly scale total primary productivity; (b). Half-hourly scale net ecosystem exchange; (c). Half-hourly scale ecosystem respiration; (d). Half-hourly scale precipitation; (e). Half-hourly scale photosynthetically active radiation; (f). Half-hourly scale temperature; (g). Half-hourly scale saturation vapor pressure deficit; (h). Half-hourly scale wind speed; (i). Half-hourly scale thermal radiation; (j). Half-hourly scale sensible heat; (k). Half-hourly scale latent heat.)

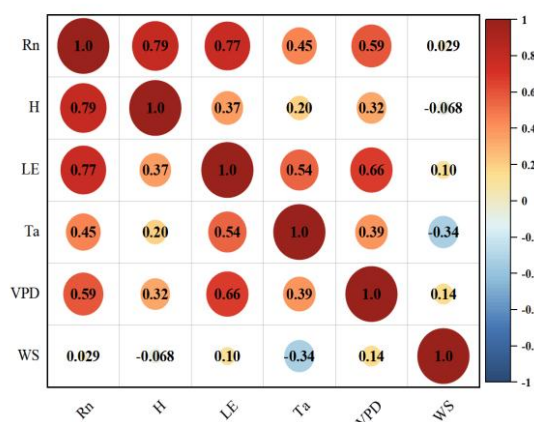

Fig S2. Half-hour heat map of caloric influencing factors
